# Supplementary material for: Benchmarking an 11-qubit quantum computer
Source: PubMed Central journal article supplement (PMC6884641; doi:10.1038/s41467-019-13534-2), 2019-11-29
Supplement: 41467_2019_13534_MOESM1_ESM.pdf [file 41467_2019_13534_MOESM1_ESM.pdf]

# Benchmarking an 11-qubit quantum computer

Wright, et. al.

November 2019

## 1 Supplemental Information

The supplemental information presented here is intended to provide additional information to the reader regarding the single- and two-qubit gates used in this manuscript.

| Ion | Gate Fidelity | SPAM from RB | SPAM from Microwave |
|-----|---------------|--------------|---------------------|
| 0   | 99.57(5)      | 99.31(9)     | 99.82(4)            |
| 1   | 99.62(6)      | 99.1(1)      | 99.77(5)            |
| 2   | 99.18(7)      | 99.3(1)      | 99.78(5)            |
| 3   | 99.25(9)      | 99.6(2)      | 99.78(5)            |
| 4   | 99.40(9)      | 99.3(2)      | 99.84(4)            |
| 5   | 99.46(3)      | 99.32(7)     | 99.77(5)            |
| 6   | 99.48(3)      | 99.27(6)     | 99.82(4)            |
| 7   | 99.55(4)      | 99.40(8)     | 99.83(4)            |
| 8   | 99.59(3)      | 98.94(6)     | 99.80(4)            |
| 9   | 99.64(2)      | 99.35(4)     | 99.79(5)            |
| 10  | 99.32(6)      | 99.3(1)      | 99.79(5)            |

Table 1: Single-qubit randomized benchmarking (RB) results and microwave SPAM results expressed in percentage (%). To determine single-qubit fidelities for each qubit we apply laser pulses to perform randomized benchmarking for  $\pi/2$  gates, using  $\pi$  gates to randomize the computational axes. The data are fit to a power law as described in the text. The average single-qubit fidelity is 99.5%. We can obtain SPAM errors from either the RB results or from a microwave pulse. For microwaves we tune the frequency of the microwave to the qubit splitting and the pulse time is set to drive a spin flip from  $|0\rangle \rightarrow |1\rangle$ , where the fidelity of detecting the  $|1\rangle$  state is the measured SPAM fidelity. The average SPAM fidelity from RB is 99.3% and with microwave based operations the average SPAM fidelity is 99.80%. The uncertainties for the RB results are errors from the fit to a power law (see text) and the uncertainties for microwaves are statistical errors on a binomial distribution,  $\sqrt{\frac{P_{|1\rangle}(1-P_{|1\rangle})}{n_{\text{expt}}}}$ , set by the photon counting statistics.

| 1                    | 2                    | 3                    | 4                    | 5                    | 6                    | 7                    | 8                    | 9                    | 10                   | Ion 0 / Ion 1 |
|----------------------|----------------------|----------------------|----------------------|----------------------|----------------------|----------------------|----------------------|----------------------|----------------------|---------------|
| $98.5^{+0.1}_{-0.3}$ | $97.7^{+0.4}_{-0.5}$ | $98.5^{+0.1}_{-0.3}$ | $97.2^{+0.4}_{-0.5}$ | $98.5^{+0.1}_{-0.3}$ | $96.9^{+0.5}_{-0.5}$ | $97.2^{+0.3}_{-0.5}$ | $98.7^{+0.4}_{-0.5}$ | $95.5^{+0.4}_{-0.6}$ | $97.1^{+0.1}_{-0.3}$ | 0             |
|                      | $97.7^{+0.4}_{-0.6}$ | $98.9^{+0.1}_{-0.3}$ | $98.2^{+0.1}_{-0.3}$ | $97.4^{+0.1}_{-0.3}$ | $97.8^{+0.1}_{-0.3}$ | $98.1^{+0.1}_{-0.3}$ | $98.4^{+0.1}_{-0.3}$ | $97.7^{+0.3}_{-0.5}$ | $97.9^{+0.1}_{-0.3}$ | 1             |
|                      |                      | $98.0^{+0.2}_{-0.3}$ | $97.5^{+0.3}_{-0.4}$ | $96.5^{+0.5}_{-0.6}$ | $98.4^{+0.1}_{-0.3}$ | $98.0^{+0.1}_{-0.3}$ | $97.2^{+0.3}_{-0.5}$ | $97.3^{+0.1}_{-0.3}$ | $96.0^{+0.6}_{-0.6}$ | 2             |
|                      |                      |                      | $96.4^{+0.4}_{-0.5}$ | $97.4^{+0.1}_{-0.3}$ | $97.1^{+0.4}_{-0.5}$ | $98.9^{+0.1}_{-0.3}$ | $96.0^{+0.3}_{-0.5}$ | $98.0^{+0.1}_{-0.3}$ | $97.7^{+0.1}_{-0.3}$ | 3             |
|                      |                      |                      |                      | $98.6^{+0.3}_{-0.6}$ | $97.3^{+0.4}_{-0.4}$ | $97.3^{+0.5}_{-0.5}$ | $98.3^{+0.4}_{-0.5}$ | $97.8^{+0.1}_{-0.3}$ | $96.5^{+0.5}_{-0.6}$ | 4             |
|                      |                      |                      |                      |                      | $96.5^{+0.4}_{-0.6}$ | $97.1^{+0.3}_{-0.5}$ | $98.4^{+0.3}_{-0.4}$ | $95.1^{+0.5}_{-0.7}$ | $96.7^{+0.5}_{-0.6}$ | 5             |
|                      |                      |                      |                      |                      |                      | $96.2^{+0.4}_{-0.6}$ | $97.2^{+0.3}_{-0.6}$ | $98.1^{+0.4}_{-0.5}$ | $98.2^{+0.4}_{-0.5}$ | 6             |
|                      |                      |                      |                      |                      |                      |                      | $97.3^{+0.4}_{-0.6}$ | $98.5^{+0.3}_{-0.3}$ | $97.3^{+0.4}_{-0.6}$ | 7             |
|                      |                      |                      |                      |                      |                      |                      |                      | $96.7^{+0.4}_{-0.5}$ | $97.0^{+0.3}_{-0.6}$ | 8             |
|                      |                      |                      |                      |                      |                      |                      |                      |                      | $97.5^{+0.4}_{-0.5}$ | 9             |

Table 2: Raw fidelity of native two-qubit gates expressed in percentage (%). For each qubit pair, we perform the gate and measure the joint populations of pair qubits as a function of analysis pulse phase angle to determine the parity contrast of the created Bell state. The resulting parity and joint-population are determined using maximum likelihood estimation to extract the fidelities enumerated above. The uncertainties are the  $1\sigma$  confidence interval determined from maximum likelihood estimation. The average fidelity is 97.5% with a minimum and maximum fidelity of 95.1% and 98.9% respectively.
